# Supplementary material for: Hesitancy towards Childhood Vaccinations among Parents of Children with Underlying Chronic Medical Conditions in Italy
Source: Vaccines (Basel). 2022 Aug 4;10(8):1254. doi: 10.3390/vaccines10081254 (PMC9416633; doi:10.3390/vaccines10081254)
Supplement: Supplementary file 1 [file vaccines-10-01254-s001.zip › vaccines-1851904-supplementary.pdf]

## QUESTIONNAIRE

### **A. SOCIO-DEMOGRAPHIC AND ANAMNESTIC CHARACTERISTICS**

*The questions in this section are aimed to acquire information on your socio-demographic and anamnesic characteristics*

**A1.** How old are you? \_\_\_\_\_

**A2.** What is your gender? ☐ Male ☐ Female

**A3.** What is your marital status? ☐ Married ☐ Cohabiting ☐ Single ☐ Divorced ☐ Widow/widower

☐ Other (please specify) \_\_\_\_\_

**A4.** What is your educational level? ☐ None ☐ Primary school ☐ High school degree ☐ Baccalaureate

☐ Graduate degree ☐ Other (please specify) \_\_\_\_\_

**A5.** What is your current job? \_\_\_\_\_

**A6.** What is the education level of your partner? ☐ None ☐ Primary school ☐ High school degree ☐ Baccalaureate ☐ Graduate degree ☐ Other (please specify) \_\_\_\_\_

**A7.** What is your partner current job? \_\_\_\_\_

**A8.** How many children do you have? \_\_\_\_\_

*The following questions are referred to the child that you brought to the doctor.*

**A9.** How old is your child? \_\_\_\_\_

**A10.** What is the gender of your child? ☐ Male ☐ Female

**A11.** What diseases does your child have? \_\_\_\_\_

**A12.** Does your child take any medication? ☐ No ☐ Yes

**A13.** How would you rate your child's health on a scale from 1 to 10, with 10 being healthiest?

1                      2                      3                      4                      5                      6                      7                      8                      9                      10

### **B. KNOWLEDGE**

*The questions in this section are aimed at acquiring information on your knowledge about the recommended vaccinations for your child*

**B1.** For which of the following diseases is available a vaccine in Italy?

Tetanus/Diphtheria/Pertussis ☐ Yes ☐ No ☐ Do not know

Hepatitis A ☐ Yes ☐ No ☐ Do not know

Hepatitis B ☐ Yes ☐ No ☐ Do not know

Pneumococcal disease ☐ Yes ☐ No ☐ Do not know

Poliomyelitis ☐ Yes ☐ No ☐ Do not know

Seasonal influenza ☐ Yes ☐ No ☐ Do not know

Varicella ☐ Yes ☐ No ☐ Do not know

Measles/Mumps/Rubella ☐ Yes ☐ No ☐ Do not know

Meningococcal disease ☐ Yes ☐ No ☐ Do not know

*Haemophilus influenzae* type B ☐ Yes ☐ No ☐ Do not know

Rotavirus infection ☐ Yes ☐ No ☐ Do not know

Human papillomavirus (HPV) infection ☐ Yes ☐ No ☐ Do not know

**B2.** Are children with chronic diseases at greater risk of complications from vaccine preventable diseases (VPDs)?

☐ Yes ☐ No ☐ Do not know

**B3.** Which of the following vaccinations are recommended for children with chronic conditions?

☐ Diphtheria ☐ Tetanus ☐ Pertussis ☐ Hepatitis B ☐ Seasonal influenza

☐ Poliomyelitis ☐ Measles ☐ Mumps ☐ Rubella ☐ Varicella

☐ Pneumococcal ☐ HPV ☐ Rotavirus ☐ Meningococcal ☐ *Haemophilus influenzae* type B

☐ Hepatitis A

### **C. ATTITUDES AND BEHAVIORS**

*The questions in this section are aimed at acquiring information on your attitudes and behaviors towards the recommended vaccinations for your child*

**B1.** How serious do you consider the VPDs on a scale from 1 to 10?

Not serious      1                      2                      3                      4                      5                      6                      7                      8                      9                      10                      Very serious

**B2.** How useful do you consider the vaccinations on a scale from 1 to 10?

|            |   |   |   |   |   |   |   |   |   |    |             |
|------------|---|---|---|---|---|---|---|---|---|----|-------------|
| Not useful | 1 | 2 | 3 | 4 | 5 | 6 | 7 | 8 | 9 | 10 | Very useful |
|------------|---|---|---|---|---|---|---|---|---|----|-------------|

**B3.** How dangerous do you consider the vaccinations for your child on a scale from 1 to 10?

|               |   |   |   |   |   |   |   |   |   |    |                |
|---------------|---|---|---|---|---|---|---|---|---|----|----------------|
| Not dangerous | 1 | 2 | 3 | 4 | 5 | 6 | 7 | 8 | 9 | 10 | Very dangerous |
|---------------|---|---|---|---|---|---|---|---|---|----|----------------|

**B4.** How worried are you about the side effects of vaccinations?

|             |   |   |   |   |   |   |   |   |   |    |              |
|-------------|---|---|---|---|---|---|---|---|---|----|--------------|
| Not worried | 1 | 2 | 3 | 4 | 5 | 6 | 7 | 8 | 9 | 10 | Very worried |
|-------------|---|---|---|---|---|---|---|---|---|----|--------------|

**B5.** Have you ever delayed having your child get a shot for reasons other than illness or allergy?

☐ Yes, for which reason? \_\_\_\_\_

☐ No, for which reason? \_\_\_\_\_

**B6.** Have you ever decided not to have your child get a shot for reasons other than illness or allergy?

☐ Yes, for which reason? \_\_\_\_\_

☐ No, for which reason? \_\_\_\_\_

**B7.** How sure are you that following the recommended shot schedule is a good idea for your child?

|                 |   |   |   |   |   |   |   |   |   |    |                 |
|-----------------|---|---|---|---|---|---|---|---|---|----|-----------------|
| Not at all sure | 1 | 2 | 3 | 4 | 5 | 6 | 7 | 8 | 9 | 10 | Completely sure |
|-----------------|---|---|---|---|---|---|---|---|---|----|-----------------|

**B8.** Children get more shots than are good for them.

☐ Strongly disagree ☐ Disagree ☐ Not sure ☐ Agree ☐ Strongly agree

**B9.** I believe that many of the illnesses shots prevent are severe.

☐ Strongly disagree ☐ Disagree ☐ Not sure ☐ Agree ☐ Strongly agree

**B10.** It is better for my child to develop immunity by getting sick than to get a shot.

☐ Strongly disagree ☐ Disagree ☐ Not sure ☐ Agree ☐ Strongly agree

**B11.** It is better for children to get fewer vaccines at the same time.

☐ Strongly disagree ☐ Disagree ☐ Not sure ☐ Agree ☐ Strongly agree

**B12.** How concerned are you that your child might have a serious side effect from a shot?

☐ Not at all concerned ☐ Slightly concerned ☐ Not sure ☐ Moderately concerned ☐ Extremely concerned

**B13.** How concerned are you that any one of the childhood shots might not be safe?

☐ Not at all concerned ☐ Slightly concerned ☐ Not sure ☐ Moderately concerned ☐ Extremely concerned

**B14.** How concerned are you that a shot might not prevent the disease?

☐ Not at all concerned ☐ Slightly concerned ☐ Not sure ☐ Moderately concerned ☐ Extremely concerned

**B15.** If you had another infant today, would you want him/her to get all the recommended shots?

☐ Yes ☐ No ☐ Do not know

**B16.** Overall, how hesitant about childhood shots would you consider yourself to be?

☐ Not at all hesitant ☐ Slightly hesitant ☐ Not sure ☐ Moderately hesitant ☐ Extremely hesitant

**B17.** I trust the information I receive about shots.

☐ Strongly disagree ☐ Disagree ☐ Not sure ☐ Agree ☐ Strongly agree

**B18.** I am able to openly discuss my concerns about shots with my child's doctor.

☐ Strongly disagree ☐ Disagree ☐ Not sure ☐ Agree ☐ Strongly agree

**B19.** All things considered, how much do you trust your child's doctor?

|                     |   |   |   |   |   |   |   |   |   |    |                  |
|---------------------|---|---|---|---|---|---|---|---|---|----|------------------|
| Do not trust at all | 1 | 2 | 3 | 4 | 5 | 6 | 7 | 8 | 9 | 10 | Completely trust |
|---------------------|---|---|---|---|---|---|---|---|---|----|------------------|

**B20.** Have you ever discussed with a pediatrician/medical specialist on the recommended vaccinations for your child?

☐ Yes ☐ No

**B21.** Which of the following vaccinations did your child receive?

|                                                               |                                      |                                      |                                          |                                             |
|---------------------------------------------------------------|--------------------------------------|--------------------------------------|------------------------------------------|---------------------------------------------|
| <input type="checkbox"/> Diphtheria                           | <input type="checkbox"/> Tetanus     | <input type="checkbox"/> Pertussis   | <input type="checkbox"/> Hepatitis B     | <input type="checkbox"/> Seasonal Influenza |
| <input type="checkbox"/> Poliomyelitis                        | <input type="checkbox"/> Measles     | <input type="checkbox"/> Mumps       | <input type="checkbox"/> Rubella         | <input type="checkbox"/> Varicella          |
| <input type="checkbox"/> Pneumococcal                         | <input type="checkbox"/> HPV         | <input type="checkbox"/> Rotavirus   | <input type="checkbox"/> Meningococcal B | <input type="checkbox"/> Meningococcal C    |
| <input type="checkbox"/> <i>Haemophilus influenzae</i> type B | <input type="checkbox"/> Hepatitis A | <input type="checkbox"/> Other _____ |                                          |                                             |

**B22.** Who recommended you vaccinate your child?

☐ No one, I decided by my self ☐ Pediatrician ☐ Medical specialist ☐ Other (please specify) \_\_\_\_\_

### **C. INFORMATION**

*The questions in this section are aimed to evaluate the sources from which you acquire information on the recommended vaccinations for your child*

**C1.** From which of the following sources do you receive information about the recommended vaccinations for your child? (more than one answer is allowed)

- ☐ None   ☐ Pediatrician   ☐ Medical specialist   ☐ Internet   ☐ Mass-media   ☐ Social media  
☐ Other (please specify) \_\_\_\_\_

**C2.** Do you feel you need more information about the recommended vaccinations for your child?   ☐ No   ☐ Yes

The questionnaire is finished. Do you want to add something?

---
